# Supplementary material
Source: Springer Nature journal article supplement (https://www.springermedizin.de/resource/supplementary/10194_2014_1021_MOESM1_ESM.pdf/9423392)
Supplement: MOESM1 [file 9423392]

Preparation (first drafts)

EHF  
committee

1<sup>st</sup> evaluation, one round

European  
National  
Headache  
Societies

2<sup>nd</sup> evaluation, two rounds

International  
investigators

Approval by the committee

FINAL  
CRITERIA
